# Supplementary material
Source: publisher site journal article supplement (https://www.dovepress.com/article/403744)
Supplement: Supplementary file 1 [file get_supplementary_file.php]

Table S1 Descriptive statistics and intercomponent correlation matrices for faculty stress

|  | *Mean* | *SD* | PV | OP | IA | RS | TRB | SQ | IC |
| --- | --- | --- | --- | --- | --- | --- | --- | --- | --- |
| PV | 3.81 | 1.24 | — |  |  |  |  |  |  |
| OP | 3.97 | 1.20 | .68*** | — |  |  |  |  |  |
| IA | 3.81 | 1.06 | .50*** | .55*** | — |  |  |  |  |
| RS | 4.25 | 1.25 | .48*** | .48*** | .51*** | — |  |  |  |
| TRB | 4.29 | 1.13 | .33*** | .44*** | .57*** | .40*** | — |  |  |
| SQ | 3.79 | 1.21 | .27*** | .32*** | .43*** | .32*** | .26*** | — |  |
| IC | 3.69 | 1.15 | .19*** | .26*** | .39*** | .35*** | .37*** | .45*** | — |

*Note*. *** *p* < .001. PV = Inadequate recognition of personal values; OP = Organizational practices; IA = Instructional activities; RS = Research support; TRB = Teaching-research balance; SQ = Student quality; IC = Instructional changes.

Table S2 Descriptive statistics and interitem correlation matrices for work-related rumination

|  | *Mean* | *SD* | 1 | 2 | 3 | 4 | 5 |
| --- | --- | --- | --- | --- | --- | --- | --- |
| Item 1 | 3.31 | 1.11 | — |  |  |  |  |
| Item 2 | 3.01 | 1.17 | .69*** | — |  |  |  |
| Item 3 | 3.22 | 1.12 | .73*** | .75*** | — |  |  |
| Item 4 | 3.13 | 1.14 | .68*** | .73*** | .75*** | — |  |
| Item 5 | 3.34 | 1.11 | .65*** | .60*** | .68*** | .64*** | — |

*Note*. *** *p* < .001.

Table S3 Descriptive statistics and interitem correlation matrices for self-compassion

|  | *Mean* | *SD* | 1 | 2 | 3 | 4 | 5 | 6 | 7 | 8 | 9 | 10 | 11 | 12 |
| --- | --- | --- | --- | --- | --- | --- | --- | --- | --- | --- | --- | --- | --- | --- |
| Item 1 | 2.75 | 0.92 | — |  |  |  |  |  |  |  |  |  |  |  |
| Item 2 | 3.57 | 0.77 | -.08* | — |  |  |  |  |  |  |  |  |  |  |
| Item 3 | 3.72 | 0.78 | .15*** | .35*** | — |  |  |  |  |  |  |  |  |  |
| Item 4 | 2.90 | 1.00 | .50*** | -.06 | .16*** | — |  |  |  |  |  |  |  |  |
| Item 5 | 3.71 | 0.80 | .06 | .28*** | .36*** | .09* | — |  |  |  |  |  |  |  |
| Item 6 | 3.75 | 0.81 | .29*** | .22*** | .47*** | .30*** | .42*** | — |  |  |  |  |  |  |
| Item 7 | 3.80 | 0.79 | .20*** | .20*** | .54*** | .26*** | .36*** | .66*** | — |  |  |  |  |  |
| Item 8 | 2.73 | 0.99 | .44*** | .02 | .14*** | .45*** | -.01 | .21*** | .14*** | — |  |  |  |  |
| Item 9 | 2.70 | 0.89 | .48*** | -.02 | .26*** | .51*** | .06 | .29*** | .29*** | .52*** | — |  |  |  |
| Item 10 | 3.54 | 0.84 | .14*** | .25*** | .38*** | .16*** | .38*** | .44*** | .36*** | .11** | .13** | — |  |  |
| Item 11 | 2.97 | 0.92 | .45*** | .03 | .14*** | .41*** | .04 | .20*** | .14*** | .42*** | .44*** | .18*** | — |  |
| Item 12 | 3.44 | 0.96 | .39*** | .05 | .16*** | .39*** | .12** | .26*** | .16*** | .34*** | .35*** | .07 | .46*** | — |

*Note*. * *p* < .05, ** *p* < .01, *** *p* < .001.

Table S4 Descriptive statistics and interitem correlation matrices for depressive symptoms

|  | *Mean* | *SD* | 1 | 2 | 3 | 4 | 5 | 6 | 7 |
| --- | --- | --- | --- | --- | --- | --- | --- | --- | --- |
| Item 1 | 1.66 | 0.76 | — |  |  |  |  |  |  |
| Item 2 | 1.69 | 0.79 | .49*** | — |  |  |  |  |  |
| Item 3 | 1.60 | 0.81 | .62*** | .56*** | — |  |  |  |  |
| Item 4 | 1.68 | 0.79 | .61*** | .50*** | .68*** | — |  |  |  |
| Item 5 | 1.45 | 0.69 | .56*** | .54*** | .61*** | .62*** | — |  |  |
| Item 6 | 1.38 | 0.68 | .48*** | .40*** | .57*** | .52*** | .60*** | — |  |
| Item 7 | 1.26 | 0.57 | .46*** | .38*** | .54*** | .57*** | .56*** | .68*** | — |

*Note*. *** *p* < .001.
